# Supplementary material
Source: publisher site journal article supplement (https://www.spandidos-publications.com/3425/downloadSupplementary)
Supplement: Supplementary file 1 [file downloadSupplementary]

## Sheet: Sheet1
Table SIII.
Categories	Diseases or Functions Annotation	P-value	Predicted Activation State	Activation z-score	Molecules	No. of molecules
Protein Synthesis	Synthesis of protein	1.49e-17		-0.563	BTG2,DAP3,EEF1A1,EIF3E,EIF3I,EIF4E2,EIF4EBP2,JUN,MRPL20,MRPL27,MRPL42,RPL10A,RPL12,RPL18,RPL18A,RPL19,RPL39,RPL7,RPL7A,RPLP2,RPS10,RPS15,RPS19,RPS28,RPS5,RPS6,SAT1,TST,UBA52,YTHDF3	30
Protein Synthesis	Translation	1.95e-17		0	BTG2,DAP3,EEF1A1,EIF3E,EIF3I,EIF4E2,EIF4EBP2,MRPL20,MRPL27,MRPL42,RPL10A,RPL12,RPL18,RPL18A,RPL19,RPL39,RPL7,RPL7A,RPLP2,RPS10,RPS15,RPS19,RPS28,RPS5,RPS6,TST,UBA52	27
Protein Synthesis	Expression of protein	7.26e-17		0.152	BTG2,DAP3,EIF3E,EIF3I,EIF4E2,EIF4EBP2,JUN,MRPL20,MRPL27,MRPL42,RPL10A,RPL12,RPL18,RPL18A,RPL19,RPL39,RPL7,RPL7A,RPLP2,RPS10,RPS15,RPS19,RPS28,RPS5,RPS6,TST,UBA52	27
Protein Synthesis	Translation of protein	8.94e-17			BTG2,DAP3,EIF3E,EIF3I,EIF4E2,EIF4EBP2,MRPL20,MRPL27,MRPL42,RPL10A,RPL12,RPL18,RPL18A,RPL19,RPL39,RPL7,RPL7A,RPLP2,RPS10,RPS15,RPS19,RPS28,RPS5,RPS6,TST,UBA52	26
RNA Damage and Repair	Nonsense-mediated mRNA decay	4.55e-16			EIF3E,RPL10A,RPL12,RPL18,RPL18A,RPL19,RPL39,RPL7,RPL7A,RPLP2,RPS10,RPS15,RPS19,RPS28,RPS5,RPS6,UBA52	17
Protein Synthesis	Initiation of translation of protein	5.06e-16			EIF3E,EIF3I,RPL10A,RPL12,RPL18,RPL18A,RPL19,RPL39,RPL7,RPL7A,RPLP2,RPS10,RPS15,RPS19,RPS28,RPS5,RPS6,UBA52	18
Protein Synthesis	Metabolism of protein	1.81e-10		-1.117	ASPH,ATG4B,BTG2,CSTB,CTSL,DAP3,EEF1A1,EIF3E,EIF3I,EIF4E2,EIF4EBP2,JUN,MRPL20,MRPL27,MRPL42,PARL,RPL10A,RPL12,RPL18,RPL18A,RPL19,RPL39,RPL7,RPL7A,RPLP2,RPS10,RPS15,RPS19,RPS28,RPS5,RPS6,SAT1,TST,UBA52,UBB,WNT10B,YTHDF3	37
Cancer,Organismal Injury and Abnormalities,Respiratory Disease	Stage I metastatic non-small cell lung carcinoma	5.12e-07			EEF1A1,MAFB,PPIA,RPL7,RPS6,TPT1	6
Gene Expression	Expression of mRNA	5.01e-06		-1	BTG2,COPZ1,EIF3E,EIF3I,EIF4E2,EIF4EBP2,POLR2K,RPL19,RPL39,RPS5	10
Cancer,Organismal Injury and Abnormalities,Respiratory Disease	Stage I non-small cell lung carcinoma	8.05e-06			ATIC,EEF1A1,MAFB,PPIA,RPL7,RPS6,TPT1	7
Gene Expression,Protein Synthesis	Translation of mRNA	1.37e-05			BTG2,EIF3E,EIF3I,EIF4E2,EIF4EBP2,RPL19,RPL39,RPS5	8
RNA Post-Transcriptional Modification	Processing of rRNA	5.18e-05			DCAF13,RPL7,RPS15,RPS19,RPS28,RPS6,SNU13	7
Cancer,Organismal Injury and Abnormalities,Respiratory Disease	Stage I-IV non-small cell lung cancer	8.1e-05			ATIC,EEF1A1,EIF4E2,MAFB,PPIA,RPL7,RPS6,TPT1	8
Cancer,Organismal Injury and Abnormalities	Stage I-II cancer	8.98e-05			ATIC,EEF1A1,JUN,MAFB,MIAT,PPIA,RPL7,RPS6,SNHG16,TPT1	10
Lipid Metabolism,Molecular Transport,Small Molecule Biochemistry	Quantity of globotetraosylceramide	9.04e-05			GLA,ST6GALNAC5	2
Small Molecule Biochemistry	Catabolism of cyanate	9.04e-05			MPST,TST	2
Cardiovascular Disease,Developmental Disorder,Hematological Disease,Organismal Injury and Abnormalities	Congenital anemia	0.000209			HBA1/HBA2,RPL18,RPS10,RPS19,RPS28,RUNX1	6
Cancer,Organismal Injury and Abnormalities	Stage I cancer	0.000232			ATIC,EEF1A1,MAFB,PPIA,RPL7,RPS6,SNHG16,TPT1	8
Cancer,Cardiovascular Disease,Developmental Disorder,Hematological Disease,Hereditary Disorder,Organismal Injury and Abnormalities	Diamond-Blackfan anemia	0.000234			RPL18,RPS10,RPS19,RPS28	4
Cardiovascular Disease,Hematological Disease,Organismal Injury and Abnormalities	Aplastic anemia	0.000316			PPIA,RPL18,RPS10,RPS19,RPS28,RUNX1	6
Cardiovascular Disease,Developmental Disorder,Hematological Disease,Organismal Injury and Abnormalities	Congenital aplastic anemia	0.000447			RPL18,RPS10,RPS19,RPS28,RUNX1	5
Cancer,Organismal Injury and Abnormalities,Respiratory Disease	Metastatic non-small cell lung carcinoma	0.00045			ATIC,EEF1A1,MAFB,PPIA,RPL7,RPS6,TPT1	7
RNA Post-Transcriptional Modification	Processing of RNA	0.000481			CTNNBL1,CWC27,DCAF13,POLR2K,RBMS1,RPL7,RPS15,RPS19,RPS28,RPS6,SFPQ,SNU13,SPI1	13
Infectious Diseases	Viral Infection	0.000531		0.548	BCLAF1,BTG2,COPZ1,CTSL,DCAF13,EEF1A1,EIF3I,GSTO1,H2BC15,HBA1/HBA2,IER3,JUN,MED19,MGLL,PDXK,PIK3R5,PMS2P1,POLR2K,PPIA,PSMB6,RNF150,RPL10A,RPL12,RPL18,RPS10,RPS5,RPS6,RUNX1,SERPINB6,SFPQ,SNU13,TCFL5,TMEM173,TPT1,UBA52,UBB	36
Cancer,Hematological Disease,Hereditary Disorder,Organismal Injury and Abnormalities	Constitutional bone marrow failure syndrome	0.000624			RPL18,RPS10,RPS19,RPS28,RUNX1	5
Cellular Assembly and Organization,Cellular Function and Maintenance	Formation of ribosome	0.000739			RBIS,RPS10,RPS28	3
Cell Cycle	Arrest in G2/M phase transition of lung cancer cell lines	0.000887			RPL7A,RPS6	2
Cancer,Organismal Injury and Abnormalities	Metastatic carcinoma	0.00103			ATIC,EEF1A1,KLF6,MAFB,PPIA,RPL7,RPS6,SNHG16,TPT1	9
Cardiovascular Disease,Organismal Injury and Abnormalities	Intermediate disease stage peripheral arterial disease	0.00143			BTG2,HBA1/HBA2,MAFB,PFDN4,POLR2K,RUNX1,SAT1	7
Cancer,Organismal Injury and Abnormalities	Early stage solid tumor	0.00155			ATIC,EEF1A1,JUN,MAFB,PPIA,RPL7,RPS6,SNHG16,TPT1	9
Hematological Disease,Infectious Diseases	Ebola hemorrhagic fever	0.00168			MGLL,RPL18,RPS6	3
Protein Synthesis	Elongation of protein	0.00207			DAP3,EEF1A1,MRPL20,MRPL27,MRPL42	5
Cell Cycle	Arrest in G2/M phase transition of carcinoma cell lines	0.00244			RPL7A,RPS6	2
Infectious Diseases	Infection by Marburg virus	0.00311			RPL18,RPS6	2
Lipid Metabolism,Molecular Transport,Small Molecule Biochemistry	Quantity of glycosylceramide	0.00311			GLA,ST6GALNAC5	2
Dermatological Diseases and Conditions,Immunological Disease,Inflammatory Disease,Inflammatory Response,Organismal Injury and Abnormalities	Atopic dermatitis	0.00334			CTSL,EEF1A1,EIF3E,GSTO1,JUN,PITPNB,PPIA,SPI1,XRCC6	9
Cellular Development,Cellular Growth and Proliferation,Connective Tissue Development and Function,Hematological System Development and Function,Hematopoiesis,Organismal Development,Tissue Development	Development of erythroid precursor cells	0.00345			RPS19,RUNX1,SPI1	3
Gene Expression	Expression of RNA	0.00354		0.717	ANXA7,BCLAF1,BTG2,CBX5,COPZ1,EIF3E,EIF3I,EIF4E2,EIF4EBP2,ID2,JUN,KLF6,LITAF,LRRFIP1,MAFB,MED13,PHIP,PID1,PMF1/PMF1-BGLAP,POLR2K,RPL19,RPL39,RPS5,RUNX1,SBNO2,SFPQ,SPI1,TCFL5,TERF2IP,TMEM173,TNRC6C,UBA52,UBB,WWC3,XRCC6	35
Connective Tissue Disorders,Developmental Disorder,Hereditary Disorder,Organismal Injury and Abnormalities,Skeletal and Muscular Disorders	Mandibulofacial dysostosis	0.00387			POLR1D,RPS28	2
Infectious Diseases	Replication of Influenza A virus	0.00443		-0.925	EEF1A1,H2BC15,JUN,PIK3R5,RNF150,RPS10,RPS5,RUNX1,SFPQ	9
Developmental Disorder,Hereditary Disorder,Neurological Disease,Organismal Injury and Abnormalities,Psychological Disorders	Familial pervasive developmental disorder	0.00446			ANKRD11,RNF135,WDR93	3
Connective Tissue Disorders,Hematological Disease,Organismal Injury and Abnormalities	Severe thrombocytopenia	0.0047			PPIA,RUNX1	2
Cardiovascular Disease,Organismal Injury and Abnormalities	Peripheral arterial disease	0.00532			BTG2,COL6A1,HBA1/HBA2,MAFB,PFDN4,POLR2K,RUNX1,SAT1	8
Free Radical Scavenging,Small Molecule Biochemistry	Catabolism of hydrogen peroxide	0.0056			HBA1/HBA2,PRDX1	2
Cell Cycle	G2/M phase transition of tumor cell lines	0.00606			LIN9,RPL7A,RPS6	3
Cellular Compromise,Inflammatory Response	Degranulation of neutrophils	0.00651			BRI3,CSTB,EEF1A1,GDI2,GLA,PDXK,PGAM1,PPIA,SERPINB6,TMEM173,XRCC6	11
Cell Morphology,Cellular Function and Maintenance	Autophagy of prostate cancer cell lines	0.00658			BNIP3L,COPZ1	2
Cancer,Hematological Disease,Hereditary Disorder,Immunological Disease,Organismal Injury and Abnormalities	Autosomal dominant acute myeloid leukemia	0.00658			MLF1,RUNX1	2
Immunological Disease	Systemic autoimmune syndrome	0.00659			ATIC,ATP5MC2,COL6A1,ECHDC1,EEF1E1,EIF3E,GPSM3,HBA1/HBA2,JUN,MAFB,MGLL,MLF1,NFKBIL1,PHIP,PMF1/PMF1-BGLAP,PPIA,PRDX1,RPL18,RPL18A,RPL19,RPLP2,RPS19,SBNO2,STXBP6,TMEM173,UBB,WNT10B,XRCC6	28
Connective Tissue Disorders,Developmental Disorder,Organismal Injury and Abnormalities,Skeletal and Muscular Disorders	Dysplasia of bone	0.00721			CWC27,POLR1D,RMRP,RPS28	4
Connective Tissue Disorders,Hematological Disease,Organismal Injury and Abnormalities	Thalassemia	0.00745			HBA1/HBA2,PPIA,SPI1	3
Cellular Development,Cellular Growth and Proliferation,Connective Tissue Development and Function,Hematological System Development and Function,Hematopoiesis,Organismal Development,Tissue Development	Colony formation of erythroid cells	0.00763			RPS19,RUNX1	2
Infectious Diseases	Replication of RNA virus	0.00785		-0.359	EEF1A1,H2BC15,JUN,PIK3R5,PPIA,RNF150,RPS10,RPS5,RPS6,RUNX1,SFPQ,TMEM173	12
Connective Tissue Disorders,Organismal Injury and Abnormalities,Skeletal and Muscular Disorders	Osteolysis	0.00796			JUN,MAFB,MGLL	3
Lipid Metabolism,Molecular Transport,Small Molecule Biochemistry	Deposition of globotriaosylceramide	0.00953			GLA	1
Cell-To-Cell Signaling and Interaction,Lipid Metabolism,Molecular Transport,Small Molecule Biochemistry	Accumulation of 2-arachidonoylglycerol	0.00953			MGLL	1
Lipid Metabolism,Molecular Transport,Small Molecule Biochemistry	Uptake of dinoprost	0.00953			SLC22A7	1
Gene Expression	Derepression of RNA	0.00953			UBB	1
Connective Tissue Disorders,Hematological Disease,Organismal Injury and Abnormalities	ZF type alpha-thalassemia	0.00953			HBA1/HBA2	1
Connective Tissue Disorders,Developmental Disorder,Gastrointestinal Disease,Hereditary Disorder,Organismal Development,Organismal Injury and Abnormalities,Skeletal and Muscular Disorders	Macrocephaly, macrosomia, facial dysmorphism syndrome	0.00953			RNF135	1
Hematological Disease	Reactive thrombocytosis	0.00953			RUNX1	1
Connective Tissue Disorders,Developmental Disorder,Hereditary Disorder,Organismal Injury and Abnormalities,Skeletal and Muscular Disorders	Metaphyseal dysplasia without hypotrichosis	0.00953			RMRP	1
Tissue Morphology	Quantity of hematopoietic cell lines	0.00953			RUNX1	1
Small Molecule Biochemistry	Flux of spermidine	0.00953			SAT1	1
Amino Acid Metabolism	Quantity of asparagine	0.00953			ZC3H10	1
Cardiovascular Disease,Hereditary Disorder,Inflammatory Disease,Metabolic Disease,Organismal Injury and Abnormalities	Infantile-onset sting-associated vasculopathy	0.00953			TMEM173	1
Molecular Transport,Small Molecule Biochemistry	Quantity of spermidine	0.00953			SAT1	1
Cell Cycle	G1 phase of CD4+ T-lymphocytes	0.00953			TMEM173	1
Cancer,Organismal Injury and Abnormalities,Reproductive System Disease	Gleason's score 7 prostatic carcinoma	0.00953			KLF6	1
Cardiovascular Disease,Developmental Disorder,Hereditary Disorder,Metabolic Disease,Organismal Injury and Abnormalities	Cardiac variant Fabry disease	0.00953			GLA	1
Cellular Assembly and Organization,DNA Replication, Recombination, and Repair	Formation of CtIP focus	0.00953			PGAM1	1
Developmental Disorder,Hereditary Disorder,Organismal Injury and Abnormalities,Skeletal and Muscular Disorders	Split-hand/foot malformation type 6	0.00953			WNT10B	1
Molecular Transport,Small Molecule Biochemistry	Depletion of spermine	0.00953			SAT1	1
Cancer,Organismal Injury and Abnormalities,Reproductive System Disease	Relapsed hormone refractory metastatic prostate cancer	0.00953			JUN	1
Developmental Disorder,Hereditary Disorder,Metabolic Disease,Organismal Injury and Abnormalities	Nuclear type 3 mitochondrial complex III deficiency	0.00953			UQCRB	1
Cancer,Organismal Injury and Abnormalities,Reproductive System Disease	Gleason's score 9 metastatic prostatic carcinoma	0.00953			KLF6	1
Neurological Disease,Organismal Injury and Abnormalities,Psychological Disorders	Argyrophilic grain disease	0.00953			UBB	1
Infectious Diseases	Replication of Dengue virus 2 Thailand/16681/84	0.00953			TMEM173	1
Cancer,Cardiovascular Disease,Developmental Disorder,Hematological Disease,Hereditary Disorder,Organismal Injury and Abnormalities	Diamond-blackfan anemia type 9	0.00953			RPS10	1
Amino Acid Metabolism	Quantity of L-tyrosine	0.00953			ZC3H10	1
Small Molecule Biochemistry	Flux of spermine	0.00953			SAT1	1
Tissue Morphology	Quantity of bone marrow cell lines	0.00953			RUNX1	1
Connective Tissue Disorders,Developmental Disorder,Hereditary Disorder,Ophthalmic Disease,Organismal Injury and Abnormalities,Skeletal and Muscular Disorders	Ectopia lentis, spontaneous filtering blebs, and craniofacial dysmorphism	0.00953			ASPH	1
Developmental Disorder,Hereditary Disorder,Ophthalmic Disease,Organismal Injury and Abnormalities,Skeletal and Muscular Disorders	Van den Ende-Gupta syndrome	0.00953			SCARF2	1
Connective Tissue Disorders,Hematological Disease,Organismal Injury and Abnormalities	Alpha thalassaemia trait	0.00953			HBA1/HBA2	1
Connective Tissue Disorders,Hematological Disease,Organismal Injury and Abnormalities	Hmong type alpha thalassemia	0.00953			HBA1/HBA2	1
Connective Tissue Disorders,Hematological Disease,Organismal Injury and Abnormalities	Non-deletional alpha thalassemia 2	0.00953			HBA1/HBA2	1
Molecular Transport,Small Molecule Biochemistry	Quantity of spermine	0.00953			SAT1	1
Cancer,Organismal Injury and Abnormalities,Reproductive System Disease	Gleason's score 10 metastatic prostatic carcinoma	0.00953			KLF6	1
Developmental Disorder,Hereditary Disorder,Organismal Injury and Abnormalities	3p- syndrome	0.00953			SRGAP3	1
Cardiovascular Disease,Cell Death and Survival,Connective Tissue Disorders,Developmental Disorder,Hematological Disease,Organismal Injury and Abnormalities	Alpha Heinz body anemias	0.00953			HBA1/HBA2	1
Cellular Development,Cellular Growth and Proliferation,Hematological System Development and Function,Lymphoid Tissue Structure and Development	Expansion of CD3 positive T-lymphocytes	0.00953			TMEM173	1
Connective Tissue Disorders,Developmental Disorder,Hematological Disease,Hereditary Disorder,Organismal Injury and Abnormalities	Severe congenital thrombocytopenia	0.00953			RUNX1	1
Cancer,Cell Death and Survival,Organismal Injury and Abnormalities,Tumor Morphology	Apoptosis of squamous carcinoma cells	0.00953			JUN	1
Developmental Disorder,Hereditary Disorder,Metabolic Disease,Organismal Injury and Abnormalities	Glycogen storage disease XI	0.00953			LDHA	1
Cellular Development,Cellular Growth and Proliferation,Hematological System Development and Function,Hematopoiesis,Lymphoid Tissue Structure and Development,Tissue Development	Development of pDC2 cells	0.00953			ID2	1
Cancer,Organismal Injury and Abnormalities	Parotidean cystadenocarcinoma	0.00953			RPS19	1
Cell Cycle,Hair and Skin Development and Function	G1/S phase transition of keratinocytes	0.00953			ID2	1
Nucleic Acid Metabolism	Quantity of NADP	0.00953			ZC3H10	1
Small Molecule Biochemistry	Formation of spermidine	0.00953			SAT1	1
Auditory Disease,Hereditary Disorder,Neurological Disease,Organismal Injury and Abnormalities	Autosomal recessive deafness type 91	0.00953			SERPINB6	1
Developmental Disorder,Hereditary Disorder,Organismal Injury and Abnormalities	ATIC deficiency	0.00953			ATIC	1
Auditory Disease,Developmental Disorder,Hereditary Disorder,Neurological Disease,Ophthalmic Disease,Organismal Injury and Abnormalities	Duane retraction syndrome 3 with deafness	0.00953			MAFB	1
Amino Acid Metabolism,Molecular Transport,Small Molecule Biochemistry	Quantity of L-proline	0.00953			ZC3H10	1
Connective Tissue Disorders,Developmental Disorder,Hereditary Disorder,Organismal Injury and Abnormalities	Cartilage-hair hypoplasia	0.00953			RMRP	1
Hereditary Disorder,Neurological Disease,Organismal Injury and Abnormalities,Skeletal and Muscular Disorders	Autosomal dominant Charcot-Marie-Tooth disease axonal type 1c	0.00953			LITAF	1
Cancer,Gastrointestinal Disease,Organismal Injury and Abnormalities	Stage I colorectal adenocarcinoma	0.00953			SNHG16	1
Developmental Disorder,Neurological Disease,Nutritional Disease	Developmental delay, dysmorphic features, intellectual disability and obesity	0.00953			PHIP	1
Cancer,Hematological Disease,Organismal Injury and Abnormalities	Alpha-globin type erythremia	0.00953			HBA1/HBA2	1
Connective Tissue Disorders,Developmental Disorder,Hereditary Disorder,Organismal Injury and Abnormalities,Skeletal and Muscular Disorders	Autosomal recessive Treacher Collins syndrome type 2	0.00953			POLR1D	1
Dental Disease,Digestive System Development and Function,Gastrointestinal Disease,Hereditary Disorder,Organismal Development,Organismal Injury and Abnormalities	Selective tooth agenesis type 8	0.00953			WNT10B	1
Cellular Compromise	Degradation of alpha-synuclein fibril	0.00953			CTSL	1
Infectious Diseases	Disassembly of Reoviridae	0.00953			CTSL	1
Connective Tissue Disorders,Hematological Disease,Organismal Injury and Abnormalities	Alpha + thalassemia	0.00953			HBA1/HBA2	1
Developmental Disorder,Hereditary Disorder,Organismal Injury and Abnormalities,Respiratory Disease	Primary ciliary dyskinesia type 32	0.00953			RSPH3	1
Cancer,Hematological Disease,Immunological Disease,Organismal Injury and Abnormalities	Chronic myeloid leukemia acute transformation	0.00953			RUNX1	1
Connective Tissue Disorders,Developmental Disorder,Hereditary Disorder,Ophthalmic Disease,Organismal Injury and Abnormalities,Skeletal and Muscular Disorders	Retinitis pigmentosa with skeletal anomalies	0.00953			CWC27	1
Developmental Disorder,Neurological Disease,Psychological Disorders	Autistic spectrum disorder with isolated skills	0.00953			WDR93	1
Lipid Metabolism,Molecular Transport,Small Molecule Biochemistry	Quantity of ganglioside M1b	0.00953			ST6GALNAC5	1
Cancer,Dermatological Diseases and Conditions,Organismal Injury and Abnormalities	Primary basal cell carcinoma	0.00953			JUN	1
Cancer,Cell Death and Survival,Organismal Injury and Abnormalities,Tumor Morphology	Apoptosis of Hodgkin's cells	0.00953			SPI1	1
Connective Tissue Disorders,Hereditary Disorder,Organismal Injury and Abnormalities,Skeletal and Muscular Disorders	Familial multicentric carpotarsal osteolysis syndrome	0.00953			MAFB	1
Organismal Injury and Abnormalities	Hemoglobin H hydrops fetalis syndrome	0.00953			HBA1/HBA2	1
Hereditary Disorder,Neurological Disease,Ophthalmic Disease,Organismal Injury and Abnormalities	Ataxia-oculomotor apraxia 3	0.00953			PIK3R5	1
Cancer,Hematological Disease,Immunological Disease,Organismal Injury and Abnormalities	Acute myelomonocytic leukemia - eosinophilic variant	0.00953			RUNX1	1
Hematological Disease	Alpha-globin type methemoglobinemia	0.00953			HBA1/HBA2	1
Connective Tissue Disorders,Hematological Disease,Organismal Injury and Abnormalities	Secondary erythrocytosis	0.00953			RUNX1	1
Cell Cycle,Embryonic Development	Arrest in cell cycle progression of mesenchymal stem cells	0.00953			RUNX1	1
Cell Cycle	Delay in initiation of G2/M phase transition of neuroblastoma cell lines	0.00953			LIN9	1
Connective Tissue Disorders,Developmental Disorder,Gastrointestinal Disease,Organismal Injury and Abnormalities,Skeletal and Muscular Disorders	Meier-Gorlin syndrome type 2	0.00953			ORC4	1
Cellular Assembly and Organization	Fusion of phospholipid vesicles	0.00953			ANXA7	1
Molecular Transport,Small Molecule Biochemistry	Depletion of spermidine	0.00953			SAT1	1
Cellular Development,Cellular Growth and Proliferation,Connective Tissue Development and Function,Hematological System Development and Function,Hematopoiesis,Organismal Development,Tissue Development	Erythropoiesis of induced pluripotent stem cells	0.00953			RUNX1	1
Developmental Disorder,Hereditary Disorder,Ophthalmic Disease,Organismal Injury and Abnormalities	Syndromic microphthalmia type 13	0.00953			HMGB3	1
Connective Tissue Disorders,Hematological Disease,Organismal Injury and Abnormalities	Nondeletional hemoglobin H disease	0.00953			HBA1/HBA2	1
Connective Tissue Disorders,Developmental Disorder,Hereditary Disorder,Neurological Disease,Organismal Injury and Abnormalities,Skeletal and Muscular Disorders	Craniofacial anomalies and anterior segment dysgenesis syndrome	0.00953			VSX1	1
Cancer,Organismal Injury and Abnormalities,Respiratory Disease	EML4-ALK positive non-small cell lung carcinoma	0.00953			LINC-ROR	1
Amino Acid Metabolism	Quantity of L-aspartic acid	0.00953			ZC3H10	1
Cancer,Connective Tissue Disorders,Hematological Disease,Hereditary Disorder,Organismal Injury and Abnormalities	Autosomal dominant familial platelet disorder with predisposition to acute myelogenous leukemia	0.00953			RUNX1	1
Cancer,Organismal Injury and Abnormalities,Reproductive System Disease	Gleason's score 6 prostatic carcinoma	0.00953			KLF6	1
Connective Tissue Disorders,Developmental Disorder,Organismal Injury and Abnormalities,Skeletal and Muscular Disorders	Dysplasia of metaphysis	0.00994			CWC27,RMRP	2
Cellular Development,Cellular Growth and Proliferation,Tissue Development	Development of induced pluripotent stem cells	0.00994			ID2,RUNX1	2
Cell Cycle,Gene Expression	Binding of protein binding site	0.0104		-0.1	ANXA7,ID2,IER3,JUN,PRDX1,RUNX1	6
Infectious Diseases	Infection of cells	0.011		1.374	BCLAF1,BTG2,COPZ1,DCAF13,EIF3I,MED19,MGLL,PMS2P1,POLR2K,PSMB6,RPL10A,RPL12,RPL18,RPS6,SERPINB6,SNU13,TCFL5,TPT1	18
Hematological Disease,Infectious Diseases	Infection by Zaire ebolavirus	0.0112			RPL18,RPS6	2
Infectious Diseases	Productive infection of cervical cancer cell lines	0.0116		-0.239	BCLAF1,MED19,PMS2P1,POLR2K,SERPINB6,TCFL5,TPT1	7
Cancer,Organismal Injury and Abnormalities	Advanced stage carcinoma	0.0116			ATIC,EEF1A1,KLF6,MAFB,PPIA,RPL7,RPS6,SNHG16,TPT1	9
Cellular Development,Cellular Growth and Proliferation,Connective Tissue Development and Function	Proliferation of fibroblast cell lines	0.0117			BTG2,KLF6,LIN9,RPS6	4
Cellular Development,Cellular Growth and Proliferation,Hematological System Development and Function,Hematopoiesis,Tissue Development	Differentiation of hematopoietic progenitor cells	0.0122	Increased	2.219	BTG2,JUN,RPS19,RUNX1,SPI1,TNRC6C	6
Cellular Development,Cellular Growth and Proliferation,Hematological System Development and Function,Hematopoiesis,Lymphoid Tissue Structure and Development,Tissue Development	Granulopoiesis	0.0127			JUN,RUNX1,SPI1	3
Cell Cycle	Interaction of DNA	0.0127		1.003	ANXA7,BTG2,ID2,IER3,JUN,PRDX1,RUNX1,SFPQ,SPI1,XRCC6	10
Protein Synthesis	Termination of translation of protein	0.013			DAP3,MRPL20,MRPL27,MRPL42	4
Connective Tissue Disorders,Hereditary Disorder,Organismal Injury and Abnormalities,Skeletal and Muscular Disorders	Multicentric carpotarsal osteolysis syndrome	0.0139			JUN,MAFB	2
Cell Morphology,Cellular Function and Maintenance	Homologous recombination repair of bone cancer cell lines	0.0139			CBX5,PGAM1	2
Developmental Disorder,Neurological Disease	Congenital cranial dysinnervation disorder	0.0139			MAFB,NPIPA8 (includes others)	2
Infectious Diseases	Infection by RNA virus	0.0152		1.374	BCLAF1,BTG2,COPZ1,DCAF13,EIF3I,HBA1/HBA2,MED19,MGLL,PMS2P1,POLR2K,PPIA,PSMB6,RPL10A,RPL12,RPL18,RPS6,SERPINB6,SNU13,TCFL5,TPT1	20
Cell Cycle,Gene Expression	Binding of estrogen response element	0.0153			ANXA7,JUN	2
Cancer,Organismal Injury and Abnormalities,Reproductive System Disease	Hormone refractory metastatic prostate cancer	0.0153			JUN,KLF6	2
Connective Tissue Disorders,Hematological Disease,Organismal Injury and Abnormalities	Erythrocytosis	0.0153			HBA1/HBA2,RUNX1	2
Cell Morphology,Cellular Function and Maintenance	Homologous recombination repair of sarcoma cell lines	0.0153			CBX5,PGAM1	2
Cardiovascular Disease,Hematological Disease,Organismal Injury and Abnormalities	Anemia	0.0157			HBA1/HBA2,JUN,MGLL,PPIA,RPL18,RPS10,RPS19,RPS28,RUNX1	9
Cell Death and Survival	Cell viability of colorectal cancer cell lines	0.0159		1.664	ATG4B,ID2,LINC-ROR,POLR1D,PSMB6,SNHG16	6
Cellular Development,Cellular Growth and Proliferation,Connective Tissue Development and Function,Hematological System Development and Function,Hematopoiesis,Organismal Development,Tissue Development	Differentiation of erythroid precursor cells	0.0163			JUN,RPS19,SPI1	3
Cellular Function and Maintenance,Molecular Transport	Exocytosis by cells	0.0179			STXBP6,TBC1D10B,WASHC1	3
Cellular Movement,Connective Tissue Development and Function	Migration of fibroblast cell lines	0.0184			ADI1,COL6A1	2
Cell Signaling,Post-Translational Modification	Activation of JUN kinase	0.0184			HACD3,MAP3K6	2
Cell Cycle	Delay in cell cycle progression of tumor cell lines	0.0184			CSTB,MGLL	2
Connective Tissue Disorders,Developmental Disorder,Hereditary Disorder,Organismal Injury and Abnormalities,Skeletal and Muscular Disorders	Autosomal dominant craniosynostosis	0.0184			POLR1D,RPS28	2
Infectious Diseases	Infection of cervical cancer cell lines	0.0186		0.508	BCLAF1,COPZ1,DCAF13,EIF3I,MED19,PMS2P1,POLR2K,SERPINB6,SNU13,TCFL5,TPT1	11
Cancer,Organismal Injury and Abnormalities,Skeletal and Muscular Disorders	Smooth muscle tumor	0.0189			ANGPT4,CTSL,HOPX,JUN,MEX3D,RPL19,RPS15,RPS19,STXBP6	9
Cellular Development,Embryonic Development,Organismal Development,Tissue Development	Differentiation of trophectoderm cells	0.019			HOPX	1
Cell Cycle,Connective Tissue Development and Function	Delay in G2/M phase transition of fibroblast cell lines	0.019			LIN9	1
Cellular Development,Cellular Growth and Proliferation,Hematological System Development and Function,Hematopoiesis,Lymphoid Tissue Structure and Development,Tissue Development	Arrest in differentiation of granulocytes	0.019			RUNX1	1
Cellular Function and Maintenance	Respiration of mononuclear leukocytes	0.019			ZC3H10	1
Energy Production	Oxidation of guanine	0.019			PRDX1	1
Connective Tissue Disorders,Hematological Disease,Hereditary Disorder,Organismal Injury and Abnormalities	Hemoglobin E/beta thalassemia disease	0.019			SPI1	1
Cellular Development,Cellular Growth and Proliferation,Hematological System Development and Function,Lymphoid Tissue Structure and Development	Expansion of CD4+ T-lymphocytes	0.019			TMEM173	1
Cell Cycle	Delay in cell cycle progression of hepatoma cell lines	0.019			MGLL	1
Developmental Disorder,Hereditary Disorder,Metabolic Disease,Organismal Injury and Abnormalities	Congenital disorder of glycosylation type 2h	0.019			COG8	1
Cell Cycle	Exit from cell cycle progression of leukemia cell lines	0.019			MLF1	1
Cell Cycle,Gene Expression	Binding of AML1 binding site	0.019			RUNX1	1
Cellular Assembly and Organization	Fusion of vesicle membrane	0.019			ANXA7	1
Cellular Assembly and Organization,DNA Replication, Recombination, and Repair	Quantity of nucleosomes	0.019			IER3	1
Connective Tissue Disorders,Dental Disease,Developmental Disorder,Gastrointestinal Disease,Hereditary Disorder,Neurological Disease,Organismal Injury and Abnormalities,Skeletal and Muscular Disorders	KBG syndrome	0.019			ANKRD11	1
Connective Tissue Disorders,Developmental Disorder,Hereditary Disorder,Organismal Injury and Abnormalities,Skeletal and Muscular Disorders	Autosomal dominant Treacher Collins syndrome	0.019			POLR1D	1
Cellular Assembly and Organization	Aggregation of chromaffin vesicles	0.019			ANXA7	1
Cellular Development,Cellular Growth and Proliferation,Embryonic Development	Arrest in proliferation of embryonic cell lines	0.019			SAT1	1
Cellular Function and Maintenance,Molecular Transport,Small Molecule Biochemistry	Exocytosis of catecholamine	0.019			STXBP6	1
Cardiovascular Disease,Hereditary Disorder,Organismal Injury and Abnormalities,Skeletal and Muscular Disorders	Brugada syndrome type 8	0.019			RANGRF	1
Developmental Disorder,Hereditary Disorder,Ophthalmic Disease,Organismal Injury and Abnormalities	Posterior polymorphous corneal dystrophy type 1	0.019			VSX1	1
Cancer,Hematological Disease,Organismal Injury and Abnormalities	Leukemogenesis	0.019			RUNX1	1
Tissue Morphology	Quantity of stem cell lines	0.019			RUNX1	1
Cardiovascular Disease,Hematological Disease,Metabolic Disease,Nutritional Disease,Organismal Injury and Abnormalities,Reproductive System Disease	Iron deficiency anemia of pregnancy	0.019			HBA1/HBA2	1
Cellular Response to Therapeutics	Ara-C-sensitivity of leukemia cell lines	0.019			RUNX1	1
Infectious Diseases	Infection by Schistosoma mansoni	0.019			HBA1/HBA2	1
Cancer,Neurological Disease,Organismal Injury and Abnormalities	Malignancy of astrocytoma	0.019			ID2	1
Vitamin and Mineral Metabolism	Biosynthesis of pyridoxal phosphate	0.019			PDXK	1
Cellular Development,Cellular Growth and Proliferation,Renal and Urological System Development and Function	Arrest in growth of kidney cell lines	0.019			SAT1	1
Amino Acid Metabolism,Molecular Transport,Small Molecule Biochemistry	Quantity of L-phenylalanine	0.019			ZC3H10	1
Developmental Disorder,Hereditary Disorder,Metabolic Disease,Organismal Injury and Abnormalities,Renal and Urological Disease	Digenic methylmalonic aciduria with homocystinuria cblC type	0.019			PRDX1	1
Cellular Movement	Invasion by Salmonella typhimurium SL1344	0.019			IER3	1
Molecular Transport,Nucleic Acid Metabolism,Small Molecule Biochemistry	Quantity of AMP	0.019			ZC3H10	1
Amino Acid Metabolism,Molecular Transport,Small Molecule Biochemistry	Quantity of alanine	0.019			ZC3H10	1
Hereditary Disorder,Metabolic Disease,Organismal Injury and Abnormalities,Skeletal and Muscular Disorders	Myopathy with exercise intolerance swedish type	0.019			ISCU	1
Cell Death and Survival	Apoptosis of multilineage progenitor cells	0.019			ID2	1
Cellular Movement	Migratory capacity of melanoma cell lines	0.019			ID2	1
Hereditary Disorder,Organismal Injury and Abnormalities	Anauxetic dysplasia	0.019			RMRP	1
Cellular Development,Cellular Growth and Proliferation,Connective Tissue Development and Function,Hematological System Development and Function,Hematopoiesis,Organismal Development,Tissue Development	Expansion of erythroid cells	0.019			RUNX1	1
Cellular Development	Arrest in differentiation of lymphoma cell lines	0.019			RUNX1	1
Cancer,Cardiovascular Disease,Developmental Disorder,Hematological Disease,Hereditary Disorder,Organismal Injury and Abnormalities	Diamond blackfan anemia type 1	0.019			RPS19	1
Cancer,Dermatological Diseases and Conditions,Organismal Injury and Abnormalities	Primary skin squamous cell carcinoma	0.019			JUN	1
Lipid Metabolism,Molecular Transport,Nucleic Acid Metabolism,Small Molecule Biochemistry	Concentration of acetyl-coenzyme A	0.019			ZC3H10	1
Cell Death and Survival	Cell viability of cervical cancer cell lines	0.0205		-0.378	EIF3E,HBA1/HBA2,IER3,JUN,PFDN4,PPP6C,SAT1	7
Organismal Injury and Abnormalities,Reproductive System Disease	Adenomyosis	0.0205			HBA1/HBA2,LDHA,STXBP6	3
Cell Death and Survival	Cell viability of tumor cell lines	0.0209		-0.009	ATG4B,BCLAF1,BTG2,CBX5,EIF3E,HBA1/HBA2,HOPX,ID2,IER3,JUN,KLF6,LDHA,LINC-ROR,MIAT,PFDN4,POLR1D,PPP6C,PSMB6,RNF31,SAT1,SNHG16	21
DNA Replication, Recombination, and Repair,Gene Expression	Methylation of DNA	0.0217			CBX5,SPI1	2
Gene Expression,RNA Damage and Repair,RNA Post-Transcriptional Modification	Stabilization of mRNA	0.0218			PSMB6,PSMC1,UBA52,UBB	4
Connective Tissue Disorders,Immunological Disease,Inflammatory Disease,Inflammatory Response,Organismal Injury and Abnormalities,Skeletal and Muscular Disorders	Rheumatoid arthritis	0.022			ATIC,ECHDC1,EEF1E1,EIF3E,GPSM3,MAFB,MGLL,NFKBIL1,PHIP,PMF1/PMF1-BGLAP,PPIA,PRDX1,RPL18A,RPL19,TMEM173,UBB,WNT10B	17
Cell Cycle,Gene Expression	Binding of NFkB binding site	0.0223			IER3,JUN,PRDX1	3
Cancer,Organismal Injury and Abnormalities,Respiratory Disease	TNM stage IIIB-IV non-small cell lung carcinoma	0.0235			ATIC,EIF4E2	2
Cancer,Organismal Injury and Abnormalities,Skeletal and Muscular Disorders	Leiomyoma	0.0245			ANGPT4,HOPX,JUN,MEX3D,RPL19,RPS15,RPS19,STXBP6	8
DNA Replication, Recombination, and Repair	Global genomic repair	0.0253			UBA52,UBB	2
Infectious Diseases	Replication of Flaviviridae	0.0262			PPIA,RPS6,TMEM173	3
Gene Expression	Transactivation of RNA	0.0263		-1.329	DAP3,JUN,KLF6,MED19,PMS2P1,POLR2K,PRDX1,RPL7A,RUNX1,SPI1	10
Cancer,Gastrointestinal Disease,Organismal Injury and Abnormalities	Buccal squamous cell carcinoma	0.0271			MGLL,NLGN2	2
Lipid Metabolism,Molecular Transport,Small Molecule Biochemistry	Quantity of globotriaosylceramide	0.0283			ST6GALNAC5	1
Inflammatory Response	Cytotoxic reaction of prostate cell lines	0.0283			PRR13	1
Free Radical Scavenging,Small Molecule Biochemistry	Reduction of hydrogen peroxide	0.0283			PRDX1	1
Cellular Assembly and Organization,Cellular Function and Maintenance,DNA Replication, Recombination, and Repair	Organization of nucleoli	0.0283			RPS19	1
Carbohydrate Metabolism	Quantity of D-ribose-5-phosphate	0.0283			ZC3H10	1
Cell Death and Survival,Organismal Injury and Abnormalities,Renal and Urological Disease	Anoikis of kidney cell lines	0.0283			DAP3	1
Cell Death and Survival	Apoptosis of blood platelets	0.0283			PPIA	1
Developmental Disorder,Neurological Disease	Moderate mental retardation	0.0283			ANKRD11	1
Carbohydrate Metabolism,Molecular Transport,Small Molecule Biochemistry	Quantity of glucose-6-phosphate	0.0283			ZC3H10	1
Carbohydrate Metabolism,Molecular Transport,Small Molecule Biochemistry	Quantity of fructose-6-phosphate	0.0283			ZC3H10	1
Connective Tissue Disorders,Developmental Disorder,Hereditary Disorder,Immunological Disease,Organismal Injury and Abnormalities,Skeletal and Muscular Disorders	Autosomal dominant Ullrich congenital muscular dystrophy	0.0283			COL6A1	1
Cancer,Dermatological Diseases and Conditions,Organismal Injury and Abnormalities	Neoplasia of melanoma cells	0.0283			CTSL	1
Infectious Diseases	Viral entry by Reston ebolavirus	0.0283			MGLL	1
Infectious Diseases	Viral entry by Cote d'Ivoire ebolavirus	0.0283			MGLL	1
Tissue Morphology	Quantity of endometrial cancer cell lines	0.0283			JUN	1
Molecular Transport,Nucleic Acid Metabolism,Small Molecule Biochemistry	Transport of cyclic GMP	0.0283			SLC22A7	1
Lipid Metabolism,Molecular Transport,Small Molecule Biochemistry	Quantity of succinic acid	0.0283			ZC3H10	1
Infectious Diseases	Viral entry by Sudan ebolavirus	0.0283			MGLL	1
Cellular Growth and Proliferation,Skeletal and Muscular System Development and Function	Cytostasis of smooth muscle cells	0.0283			ID2	1
Cell Death and Survival,Embryonic Development	Anoikis of embryonic cell lines	0.0283			DAP3	1
Cellular Assembly and Organization	Interconnectivity of mitochondria	0.0283			DAP3	1
Lipid Metabolism,Molecular Transport,Small Molecule Biochemistry	Accumulation of globotriaosylceramide	0.0283			GLA	1
Connective Tissue Disorders,Developmental Disorder,Hereditary Disorder,Immunological Disease,Organismal Injury and Abnormalities,Skeletal and Muscular Disorders	Autosomal recessive Ullrich congenital muscular dystrophy	0.0283			COL6A1	1
Connective Tissue Development and Function,Hematological System Development and Function,Hematopoiesis,Organismal Development,Tissue Morphology	Quantity of colony-forming erythroid cells	0.0283			RPS19	1
Cancer,Cardiovascular Disease,Connective Tissue Disorders,Developmental Disorder,Hematological Disease,Hereditary Disorder,Organismal Injury and Abnormalities,Skeletal and Muscular Disorders	Diamond-Blackfan anemia type 15 with mandibulofacial dysostosis	0.0283			RPS28	1
Cellular Development,Cellular Growth and Proliferation,Connective Tissue Development and Function,Hematological System Development and Function,Hematopoiesis,Organismal Development,Tissue Development	Development of cord blood cells	0.0283			SPI1	1
Energy Production,Lipid Metabolism,Molecular Transport,Small Molecule Biochemistry	Quantity of malic acid	0.0283			ZC3H10	1
Cellular Growth and Proliferation	Arrest in growth of bone marrow cell lines	0.0283			RUNX1	1
Cell Death and Survival	Delay in apoptosis of lymphoma cell lines	0.0283			RUNX1	1
Cell Morphology,Cellular Function and Maintenance	Mitochondrial membrane potential	0.029			PID1,UBB	2
Cell Death and Survival,Organismal Injury and Abnormalities	Apoptosis of epithelial cell lines	0.0293		0.816	BNIP3L,DAP3,EEF1A1,IER3,MIAT,RNF31	6
Cancer,Hematological Disease,Immunological Disease,Organismal Injury and Abnormalities	Lymphoma	0.0294			ATIC,BCLAF1,BTG2,COL6A1,CTSL,EEF1A1,ID2,JUN,KLF6,LRRFIP1,MAFB,MGLL,MRPL20,PIK3R5,PMF1/PMF1-BGLAP,PPIA,PSMB6,RNF31,RPL19,RPS15,RUNX1,SPI1,STXBP6,TNRC6C,WWC3,XRCC6	26
RNA Post-Transcriptional Modification	Splicing of mRNA	0.0298			CTNNBL1,CWC27,POLR2K,SFPQ,SNU13,SPI1	6
Post-Translational Modification,Protein Degradation,Protein Synthesis	Hydrolysis of protein fragment	0.0305			ASPH,ATG4B,CSTB,CTSL,PARL	5
Connective Tissue Disorders,Immunological Disease,Inflammatory Disease,Inflammatory Response,Organismal Injury and Abnormalities,Skeletal and Muscular Disorders	Severe rheumatoid arthritis	0.031			PPIA,WNT10B	2
Hematological Disease	Hemorrhagic disease	0.0324			ID2,MGLL,PPIA,RPL18,RPS6,RUNX1	6
DNA Replication, Recombination, and Repair	Transcription-coupled nucleotide-excision repair	0.0326			POLR2K,UBA52,UBB	3
Cell Cycle	G1 phase	0.0347			BTG2,ID2,JUN,KLF6,ORC4,PPP6C,RPL7A,RPS6,TMEM173	9
Gene Expression	Elongation of RNA	0.0349			EEF1A1,POLR2K,RUNX1	3
Gene Expression	Transcription of DNA	0.0351		0.782	BCLAF1,CBX5,ID2,JUN,KLF6,LITAF,LRRFIP1,MAFB,MED13,PHIP,PID1,PMF1/PMF1-BGLAP,POLR2K,RUNX1,SBNO2,SFPQ,SPI1,TCFL5,TERF2IP,TMEM173,WWC3,XRCC6	22
Cell Morphology,Cellular Function and Maintenance	Repair of tumor cell lines	0.0361			CBX5,PGAM1,XRCC6	3
Cancer,Organismal Injury and Abnormalities,Reproductive System Disease,Skeletal and Muscular Disorders	Uterine leiomyoma	0.0367			HOPX,JUN,MEX3D,RPL19,RPS15,RPS19,STXBP6	7
Cancer,Hematological Disease,Immunological Disease,Organismal Injury and Abnormalities	Juvenile myelomonocytic leukemia	0.0372			JUN,SPI1	2
Drug Metabolism,Molecular Transport,Small Molecule Biochemistry	Uptake of indomethacin	0.0376			SLC22A7	1
Cellular Response to Therapeutics	Radiosensitivity of squamous cell carcinoma cell lines	0.0376			ATG4B	1
Lipid Metabolism,Molecular Transport,Small Molecule Biochemistry	Quantity of lactosylceramide	0.0376			GLA	1
Cell Morphology,Cellular Function and Maintenance,DNA Replication, Recombination, and Repair	Double-stranded DNA break repair of prostate cancer cell lines	0.0376			XRCC6	1
Cell Cycle,Gene Expression	Binding of androgen-responsive element	0.0376			JUN	1
Cellular Growth and Proliferation	Cytostasis of hepatoma cell lines	0.0376			KLF6	1
Cellular Development	Epithelial-mesenchymal transition of ovarian cancer cell lines	0.0376			LINC-ROR	1
Drug Metabolism,Molecular Transport,Small Molecule Biochemistry	Uptake of ibuprofen	0.0376			SLC22A7	1
Lipid Metabolism,Small Molecule Biochemistry	Hydrolysis of 2-palmitoylglycerol	0.0376			MGLL	1
Connective Tissue Disorders,Developmental Disorder,Hereditary Disorder,Immunological Disease,Organismal Injury and Abnormalities,Skeletal and Muscular Disorders	Bethlem myopathy	0.0376			COL6A1	1
Cancer,Organismal Injury and Abnormalities	Malignant peritoneal mesothelioma	0.0376			ATIC	1
Infectious Diseases	Viral entry by Zaire ebolavirus	0.0376			MGLL	1
DNA Replication, Recombination, and Repair,Gene Expression	Methylation of DNA endogenous promoter	0.0376			SPI1	1
Cell Cycle	S phase of leukemia cell lines	0.0376			SPI1	1
Cancer,Organismal Injury and Abnormalities,Respiratory Disease	Stable disease stage non-small cell lung carcinoma	0.0376			ATIC	1
Cellular Development,Cellular Growth and Proliferation,Reproductive System Development and Function	Colony formation of gonadal cell lines	0.0376			RUNX1	1
Drug Metabolism,Molecular Transport,Small Molecule Biochemistry	Uptake of salicylic acid	0.0376			SLC22A7	1
Cancer,Cellular Movement,Organismal Injury and Abnormalities,Tumor Morphology	Invasion of melanoma cells	0.0376			CTSL	1
Dermatological Diseases and Conditions,Inflammatory Disease,Inflammatory Response,Organismal Injury and Abnormalities	Pyoderma gangrenosum	0.0376			CTSL	1
Cellular Development,Cellular Growth and Proliferation	Arrest in growth of myeloma cell lines	0.0376			SPI1	1
Cellular Growth and Proliferation,Organismal Development	Growth of Schizosaccharomyces pombe	0.0376			EIF3E	1
Drug Metabolism,Molecular Transport,Small Molecule Biochemistry	Uptake of ketoprofen	0.0376			SLC22A7	1
Cancer,Gastrointestinal Disease,Hepatic System Disease,Organismal Injury and Abnormalities	Early stage liver cancer	0.0376			JUN	1
Cell Cycle,Cell-To-Cell Signaling and Interaction,Cellular Growth and Proliferation,Connective Tissue Development and Function	Contact growth inhibition of fibroblast cell lines	0.0376			COPZ1	1
Cell Death and Survival,Dental Disease,Gastrointestinal Disease,Organismal Injury and Abnormalities	Dental pulp necrosis	0.0376			ATIC	1
Connective Tissue Disorders,Developmental Disorder,Gastrointestinal Disease,Hereditary Disorder,Organismal Development,Organismal Injury and Abnormalities,Skeletal and Muscular Disorders	Familial nonsyndromic cleft palate	0.0376			UBB	1
Lipid Metabolism,Small Molecule Biochemistry	Elongation of fatty acid	0.0376			HACD3	1
Cancer,Organismal Injury and Abnormalities,Respiratory Disease	Stage 4 stable non-small cell lung cancer	0.0376			ATIC	1
Gene Expression	Activation of DNA endogenous promoter	0.0384		0.349	CBX5,JUN,KLF6,LITAF,LRRFIP1,MED13,PHIP,PID1,PMF1/PMF1-BGLAP,POLR2K,RUNX1,SFPQ,SPI1,TCFL5,TMEM173,WWC3,XRCC6	17
Connective Tissue Disorders,Hereditary Disorder,Organismal Injury and Abnormalities	Hereditary connective tissue disorder	0.0384			ANKRD11,ASPH,COL6A1,CWC27,JUN,MAFB,MLF1,ORC4,POLR1D,RMRP,RNF135,RPS28,UBB,VSX1	14
Cancer,Organismal Injury and Abnormalities	ALK mutation positive malignant solid tumor	0.0385			ATIC,JUN,LINC-ROR	3
Cancer,Organismal Injury and Abnormalities	ALK fusion positive solid tumor	0.0385			ATIC,JUN,LINC-ROR	3
Inflammatory Disease	Chronic inflammatory disorder	0.039			ATIC,CTSL,ECHDC1,EEF1E1,EIF3E,GPSM3,HBA1/HBA2,JUN,MAFB,MGLL,NFKBIL1,PHIP,PMF1/PMF1-BGLAP,PPIA,PRDX1,RPL18A,RPL19,RSPH3,RUNX1,SBNO2,TMEM173,UBB,WNT10B	23
Cancer,Organismal Injury and Abnormalities	Subcutaneous tumor	0.0393			ANGPT4,COL6A1,HOPX,JUN,MEX3D,RPL19,RPS15,RPS19,STXBP6	9
Cell Death and Survival,Gastrointestinal Disease,Hepatic System Disease,Organismal Injury and Abnormalities	Cell death of liver cells	0.0393			IER3,JUN	2
Infectious Diseases,Organismal Injury and Abnormalities	Infection of embryonic cell lines	0.0404		1.659	BTG2,MED19,PSMB6,RPL10A,RPL12,RPL18,RPS6	7
Infectious Diseases	Infection of epithelial cell lines	0.0409		1.659	BTG2,MED19,PSMB6,RPL10A,RPL12,RPL18,RPS6	7
Cancer,Organismal Injury and Abnormalities	Primary squamous cell carcinoma	0.0415			HOPX,JUN	2
Connective Tissue Disorders,Organismal Injury and Abnormalities,Skeletal and Muscular Disorders	Non-traumatic arthropathy	0.042			ATIC,ECHDC1,EEF1E1,EIF3E,GPSM3,HBA1/HBA2,MAFB,MGLL,NFKBIL1,PHIP,PMF1/PMF1-BGLAP,PPIA,PRDX1,RPL18A,RPL19,TMEM173,UBB,WNT10B	18
Post-Translational Modification	Polyubiquitination of protein	0.0422			PSMB6,PSMC1,RNF31,UBA52,UBB	5
Cell Death and Survival,Organismal Injury and Abnormalities	Cell death of epithelial cells	0.0423		0.204	BNIP3L,DAP3,EEF1A1,IER3,JUN,LDHA,MIAT,RNF31	8
RNA Post-Transcriptional Modification	Aminoacylation of tRNA	0.0438			EEF1E1,PPA1	2
Cellular Development,Cellular Growth and Proliferation,Connective Tissue Development and Function,Hematological System Development and Function,Hematopoiesis,Organismal Development,Tissue Development	Differentiation of erythroid cells	0.0438			JUN,RPS19	2
Infectious Diseases	Infection of kidney cell lines	0.0443		1.659	BTG2,MED19,PSMB6,RPL10A,RPL12,RPL18,RPS6	7
Cancer,Hematological Disease,Organismal Injury and Abnormalities	Myelodysplastic/myeloproliferative neoplasm	0.0452			JUN,PPIA,RUNX1,SPI1	4
Connective Tissue Disorders,Hematological Disease,Organismal Injury and Abnormalities	Hemoglobinopathy	0.0452			HBA1/HBA2,MGLL,PPIA,SPI1	4
Connective Tissue Disorders,Hematological Disease,Hereditary Disorder,Organismal Injury and Abnormalities	Beta thalassemia	0.0461			PPIA,SPI1	2
Cellular Movement	Invasion of bone cancer cell lines	0.0461			EIF3E,SNHG16	2
Organismal Injury and Abnormalities,Reproductive System Disease	Benign pelvic disease	0.0462			COL6A1,ERBIN,HOPX,JUN,MEX3D,MGLL,RPL12,RPL19,RPS15,RPS19,SAT1,STXBP6,XRCC6	13
Cancer,Hematological Disease,Organismal Injury and Abnormalities	Myeloproliferative neoplasm	0.0467			DAP3,HBA1/HBA2,JUN,MLF1,PPIA,RUNX1,SPI1	7
Cancer,Organismal Injury and Abnormalities,Respiratory Disease	Stage 3A unresectable non-squamous non-small cell lung cancer	0.0468			ATIC	1
Cancer,Organismal Injury and Abnormalities,Respiratory Disease	Stage 3B unresectable non-squamous non-small cell lung cancer	0.0468			ATIC	1
Tissue Morphology	Quantity of hepatoma cell lines	0.0468			WNT10B	1
Cancer,Organismal Injury and Abnormalities,Respiratory Disease	Metastatic ALK mutation negative non-squamous non-small cell lung cancer	0.0468			ATIC	1
Amino Acid Metabolism,Small Molecule Biochemistry	Salvage of L-methionine	0.0468			ADI1	1
Molecular Transport,Nucleic Acid Metabolism,Small Molecule Biochemistry	Quantity of NADPH	0.0468			ZC3H10	1
Molecular Transport	Quantity of citric acid	0.0468			ISCU	1
Cancer,Cellular Development,Organismal Injury and Abnormalities,Tumor Morphology	Differentiation of acute promyelocytic leukemia cells	0.0468			SPI1	1
Small Molecule Biochemistry	Synthesis of polyamines	0.0468			SAT1	1
Molecular Transport	Transport of oxygen	0.0468			HBA1/HBA2	1
Cell Death and Survival	Killing of prostate cancer cell lines	0.0468			COPZ1	1
Cell Morphology,Cellular Function and Maintenance	Autophagy of monocyte-derived macrophages	0.0468			CTSL	1
Cancer,Organismal Injury and Abnormalities,Respiratory Disease	TNM stage M1b non-squamous non-small cell lung cancer	0.0468			ATIC	1
Cancer,Neurological Disease,Organismal Injury and Abnormalities	Neurofibroma	0.0468			RUNX1	1
Lipid Metabolism,Molecular Transport,Small Molecule Biochemistry	Quantity of glucosylceramide	0.0468			GLA	1
Cancer,Organismal Injury and Abnormalities,Respiratory Disease	Metastatic EGFR mutation negative non squamous non-small cell lung cancer	0.0468			ATIC	1
Cellular Assembly and Organization	Quantity of peroxisomes	0.0468			PIN4	1
Carbohydrate Metabolism,Energy Production	Quantity of pyruvic acid	0.0468			ZC3H10	1
Cell-To-Cell Signaling and Interaction,Hematological System Development and Function,Hypersensitivity Response,Immune Cell Trafficking,Inflammatory Response	Activation of eosinophils	0.0468			TPT1	1
Cancer,Organismal Injury and Abnormalities,Respiratory Disease	Stage IIIB recurrent nonsquamous non-small cell lung cancer	0.0468			ATIC	1
Cancer,Connective Tissue Disorders,Organismal Injury and Abnormalities	Primary osteosarcoma	0.0468			ID2	1
Hereditary Disorder,Ophthalmic Disease,Organismal Injury and Abnormalities	Keratoconus type 1	0.0468			VSX1	1
Cancer,Organismal Injury and Abnormalities,Respiratory Disease	TNM stage M1a non-squamous non-small cell lung cancer	0.0468			ATIC	1
Cancer,Organismal Injury and Abnormalities	Benign connective or soft tissue neoplasm	0.0482			ANGPT4,COL6A1,HOPX,JUN,MEX3D,RPL19,RPS15,RPS19,STXBP6	9
Cell Cycle	Cell cycle progression of tumor cell lines	0.0485			CSTB,IER3,MGLL,MLF1,RNF31,SFPQ,XRCC6	7
Cell Morphology,Cellular Function and Maintenance	Autophagy of cells	0.0498		1.404	ANXA7,ATG4B,BNIP3L,COPZ1,CTSL,DAP3,TBC1D10B,TMEM173	8
© 2000-2020 QIAGEN. All rights reserved.
